# Supplementary material for: 1-D nanostructure comprising porous Fe2O3/Se composite nanorods with numerous nanovoids, and their electrochemical properties for use in lithium-ion batteries
Source: Royal Society of Chemistry journal article supplement (doi:10.1039/c7ta02616a), 2017-01-01
Supplement: c7ta02616a1.pdf [file c7ta02616a1.pdf]

## SUPPLEMENTARY INFORMATION

### **1-D nanostructure comprising porous Fe<sub>2</sub>O<sub>3</sub>/Se composite nanorods with numerous nanovoids, and their electrochemical properties for use in lithium-ion batteries**

**Jung Sang Cho<sup>ab</sup>, Jin-Sung Park<sup>a</sup>, Kyung Min Jeon<sup>a</sup>, and Yun Chan Kang<sup>a\*</sup>**

<sup>a</sup>Department of Materials Science and Engineering, Korea University, Anam-dong,  
Seongbuk-gu, Seoul 136-713, Republic of Korea

<sup>b</sup>Department of Engineering Chemistry, Chungbuk National University, Chungbuk 361-  
763, Republic of Korea

E-mail: yckang@korea.ac.kr Fax: +82-2-928-3584; Tel: +82-2-3290-3268

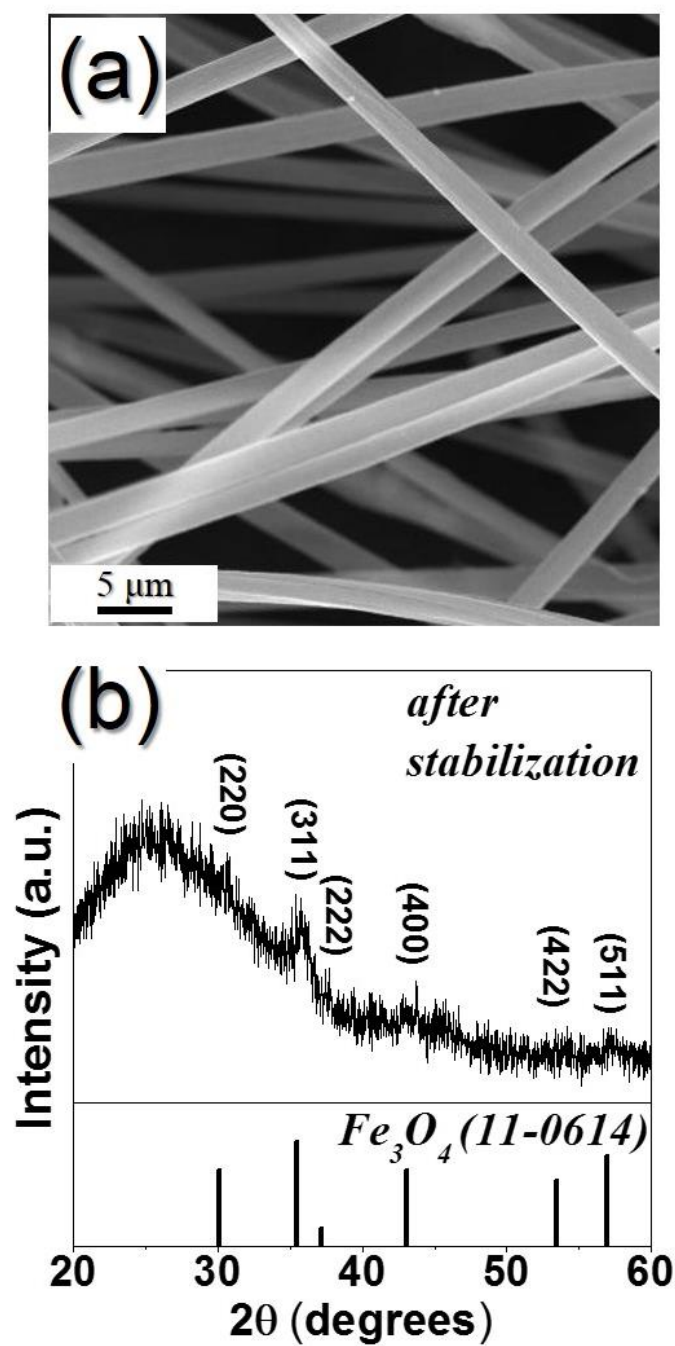

**Fig. S1.** (a) SEM image and (b) XRD pattern of the  $\text{Fe}_3\text{O}_4$ -carbon composite nanofibers after strabilization at 120  $^\circ\text{C}$  in air.

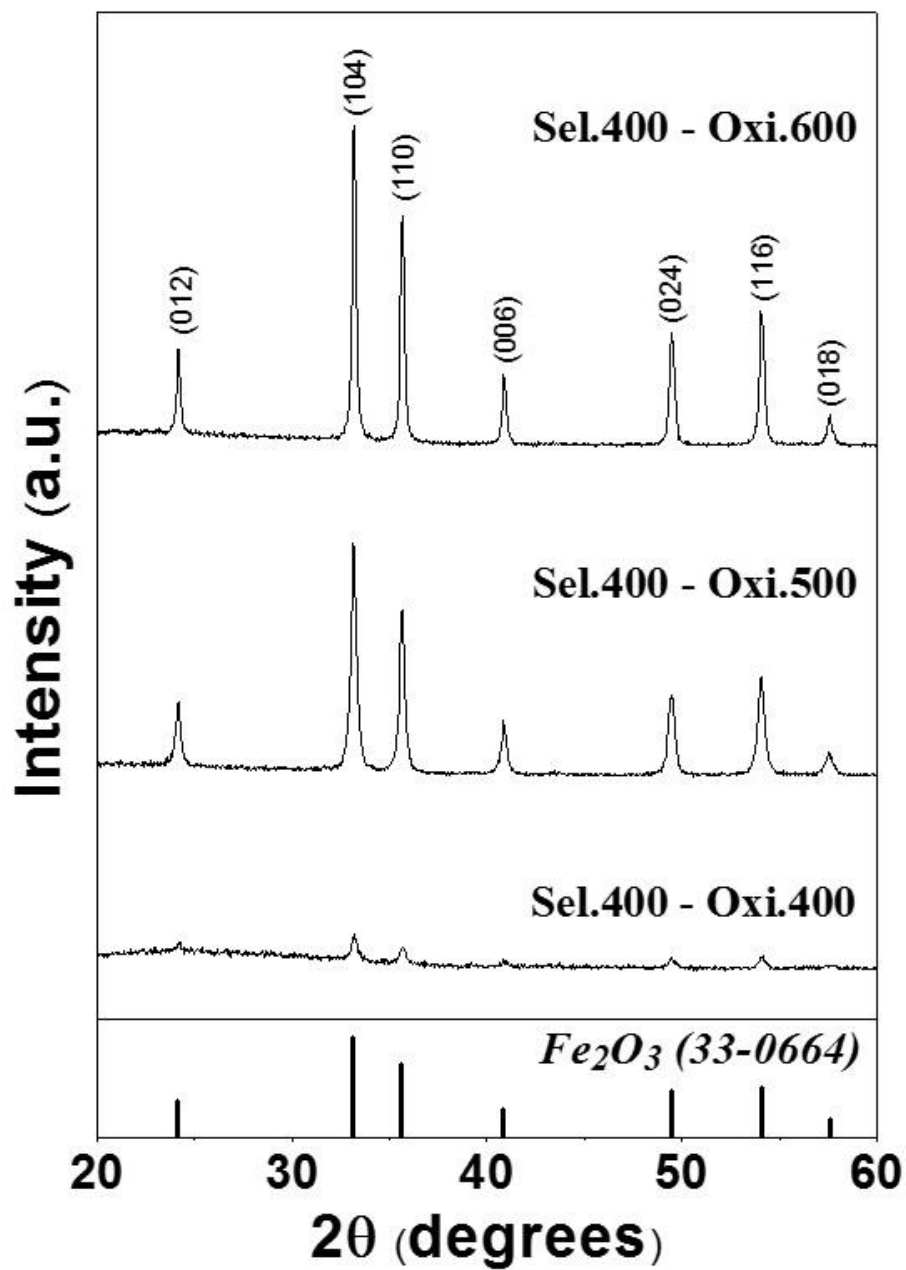

**Fig. S2.** XRD patterns of the 1-D nanostructures comprising nanorods obtained after selenization at 400 °C and subsequent oxidation at 400, 500, and 600°C.

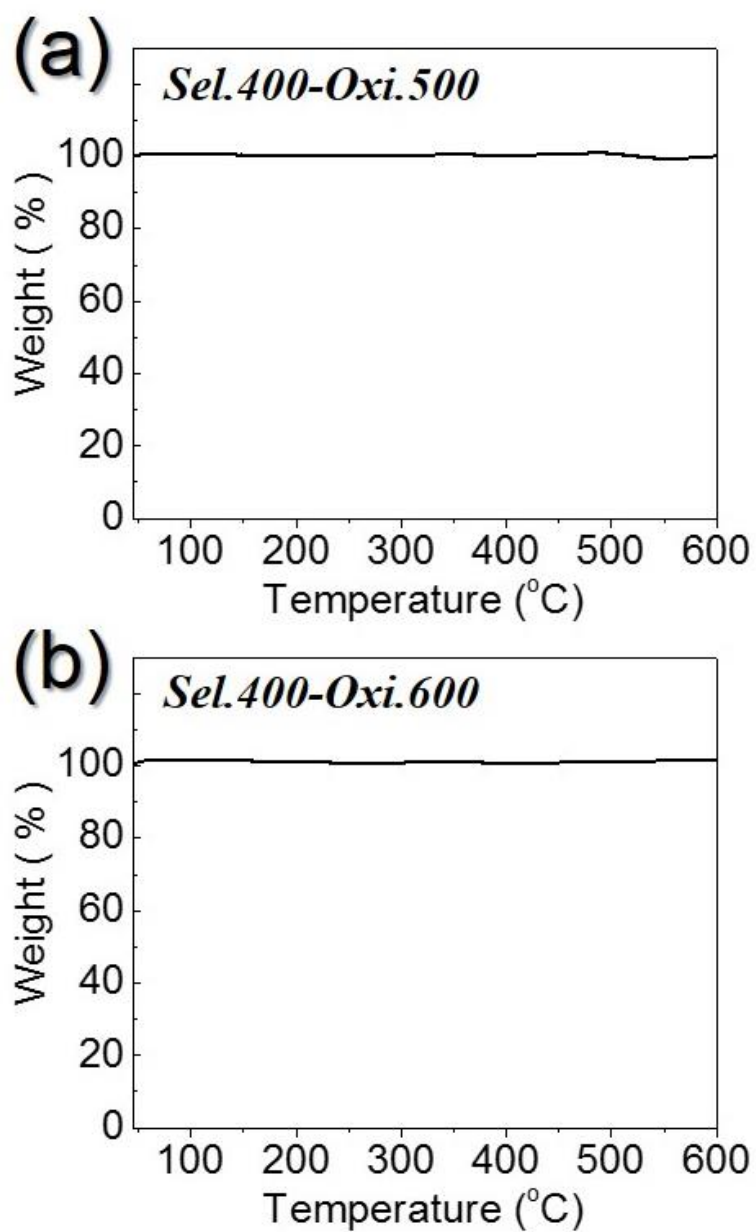

**Fig. S3.** TG analysis of the 1-D nanostructures comprising nanorods obtained after selenization at 400 °C and subsequent oxidation at 500 and 600°C: (a) Sel.400-Oxi.500, and (b) Sel.400-Oxi.600.

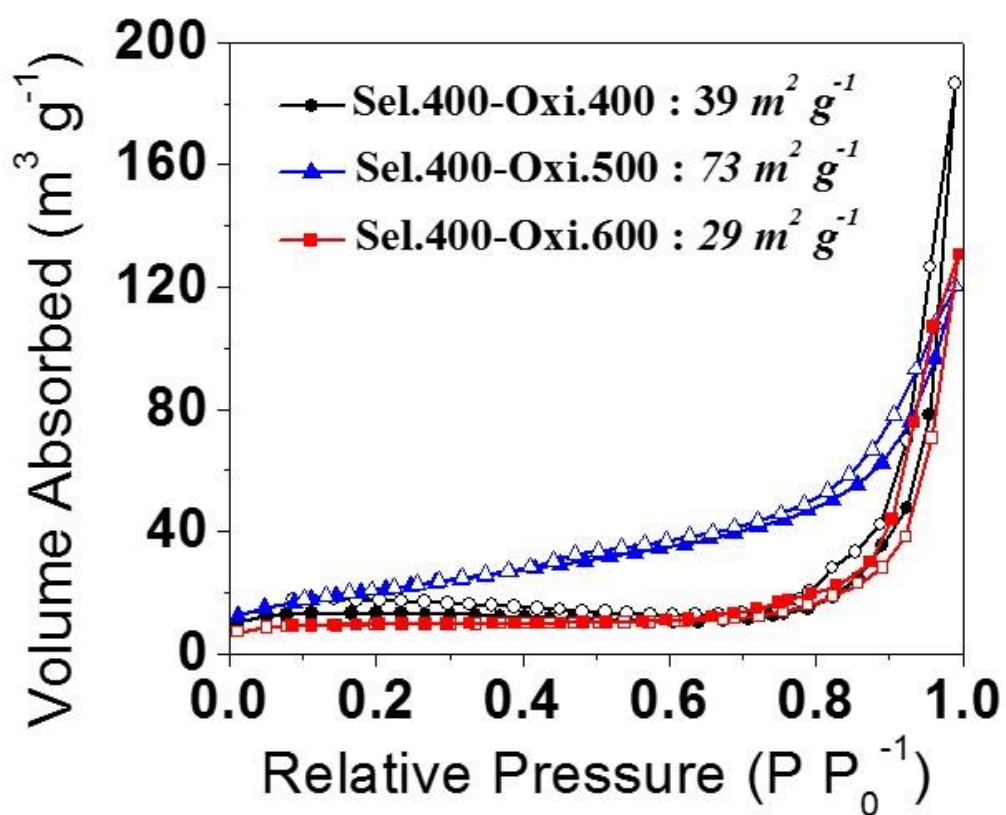

**Fig. S4.** N<sub>2</sub> adsorption-desorption isotherms of the 1-D nanostructures comprising nanorods obtained after selenization at 400 °C and subsequent oxidation at 400, 500, and 600°C.

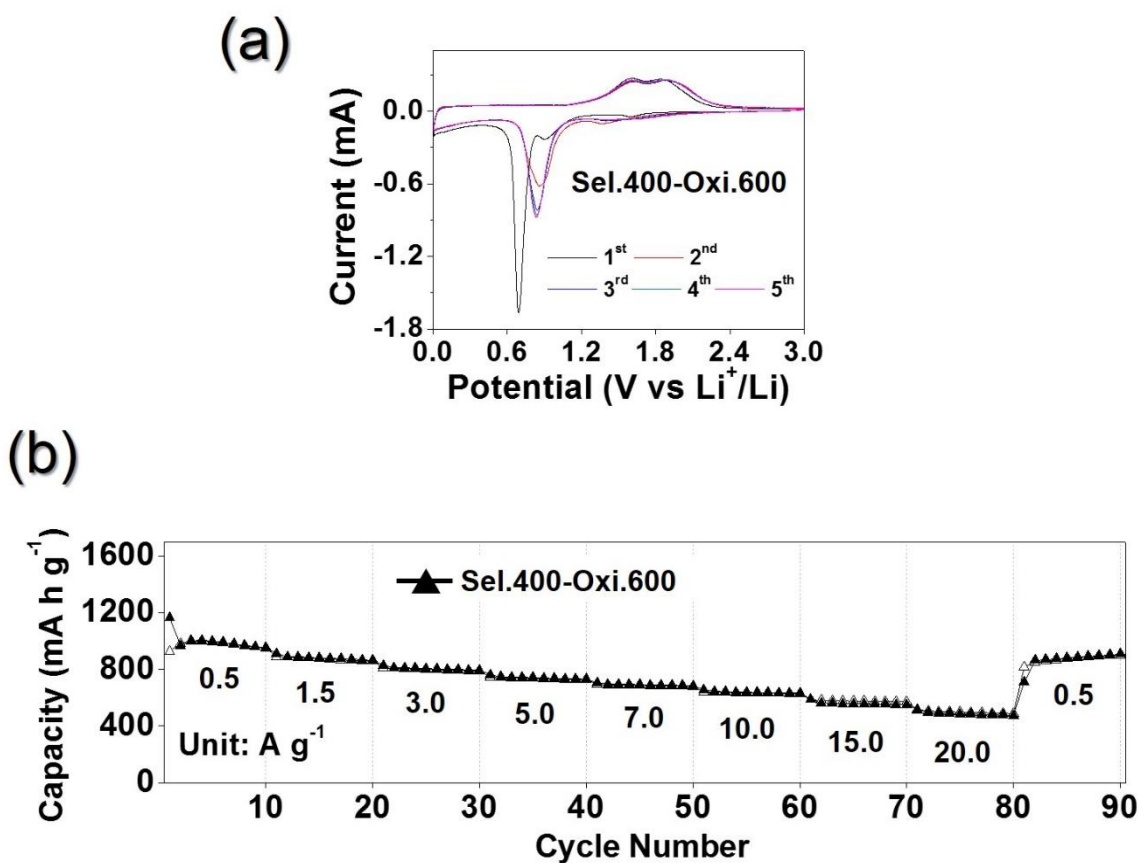

**Fig. S5.** (a) CV curves and (b) rate performance of the 1-D nanostructure comprising dense  $\text{Fe}_2\text{O}_3$  nanorods (Sel.400-Oxi.600).

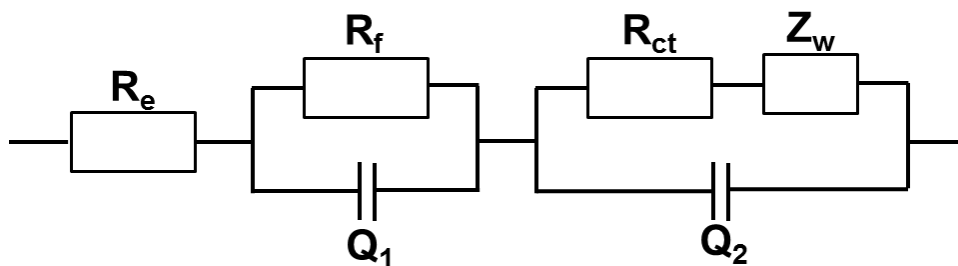

$R_e$  : the electrolyte resistance, corresponding to the intercept of high frequency semicircle at  $Z_{re}$  axis

$R_f$  : the SEI layer resistance corresponding to the high-frequency semicircle

$Q_1$  : the dielectric relaxation capacitance corresponding to the high-frequency semicircle

$R_{ct}$ : the denote the charger transfer resistance related to the middle-frequency semicircle

$Q_2$  : the associated double-layer capacitance related to the middle-frequency semicircle

$Z_w$  : the Li-ion diffusion resistance

**Fig. S6.** Randle-type equivalent circuit model used for AC impedance fitting.

FeSe<sub>2</sub> nanorods-C composite shows good lithium-ion storage characteristics. The discharge and charge capacities of the FeSe<sub>2</sub> nanorods-C composite were 928 and 923 mA h g<sup>-1</sup>, respectively, after the 200<sup>th</sup> cycle. However, the capacities are smaller than those of 1-D nanostructure comprising porous Fe<sub>2</sub>O<sub>3</sub>/Se composite nanorods prepared by subsequent oxidation process.

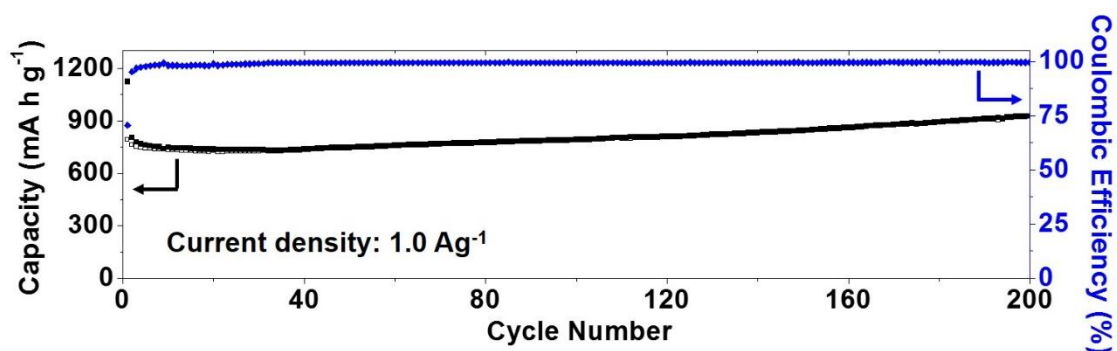

**Fig. S7.** Cycling performance of the FeSe<sub>2</sub> nanorods-C composite before oxidation process at a current density of 1.0 A g<sup>-1</sup>.



**Table S1.** Electrochemical properties of the Fe oxide materials with various structures as anode materials for LIBs.

| Morphology                                                                                | Voltage range [V] | Current density [mA g <sup>-1</sup> ] | Initial Discharge Capacity [mA h g <sup>-1</sup> ] | Initial Coulombic Efficiency [%] | Final discharge capacity [mA h g <sup>-1</sup> ] and (cycle number) | Ref.                    |
|-------------------------------------------------------------------------------------------|-------------------|---------------------------------------|----------------------------------------------------|----------------------------------|---------------------------------------------------------------------|-------------------------|
| 1-D nanostructure comprising porous Fe <sub>2</sub> O <sub>3</sub> /Se composite nanorods | 0.005-3.0         | 1000                                  | 1458                                               | 76                               | 1456 (400)                                                          | <b><i>This work</i></b> |
| Fe <sub>2</sub> O <sub>3</sub> hollow sphere                                              | 0.05-3.0          | 200                                   | 1219                                               | 79                               | 710 (100)                                                           | S1                      |
| Hierarchical hollow sphere composed of Fe <sub>2</sub> O <sub>3</sub> nanosheets          | 0.01-3.0          | 500                                   | 1255                                               | 67                               | 815 (200)                                                           | S2                      |
| Fe <sub>2</sub> O <sub>3</sub> microbox with hierarchical shell                           | 0.01-3.0          | 200                                   | 1180                                               | 71                               | 945 (30)                                                            | S3                      |
| Fe <sub>2</sub> O <sub>3</sub> hollow nanosphere                                          | 0.005-3.0         | 250                                   | 1435                                               | 70                               | 490 (50)                                                            | S4                      |
| Fe <sub>2</sub> O <sub>3</sub> hollow nanoparticles/ N-doped graphene aerogels            | 0.01-3.0          | 100                                   | 1586                                               | 64                               | 1483 (100)                                                          | S5                      |
| Fe <sub>2</sub> O <sub>3</sub> hollow nanobarrels                                         | 0.01-3.0          | 500                                   | ~1290                                              | 75                               | 916 (100)                                                           | S6                      |
| Multi-shelled Fe <sub>2</sub> O <sub>3</sub> hollow sphere                                | 0.05-3.0          | 400                                   | 1360                                               | 72                               | 861 (50)                                                            | S7                      |
| Graphene-constructed hollow sphere                                                        | 0.01-3.0          | 100                                   | 1353                                               | 82                               | 950 (50)                                                            | S8                      |
| Hierarchical Fe <sub>3</sub> O <sub>4</sub> @ polypyrrole nanocages                       | 0.01-3.0          | 200                                   | 1289                                               | 75                               | 950 (100)                                                           | S9                      |
| Hollow Fe <sub>2</sub> O <sub>3</sub> sphere with carbon coating                          | 0.01-3.0          | 300                                   | 1290                                               | 69                               | 720 (140)                                                           | S10                     |

**Table S2.** Electrochemical properties of the Fe related chalcogenide materials with various structures as anode materials for LIBs.

| Morphology                                                      | Voltage range [V] | Current density [mA g <sup>-1</sup> ] | Initial discharge capacity [mA h g <sup>-1</sup> ] | Initial Coulombic efficiency [%] | Final discharge Capacity [mA h g <sup>-1</sup> ] and (cycle number) | Ref.                    |
|-----------------------------------------------------------------|-------------------|---------------------------------------|----------------------------------------------------|----------------------------------|---------------------------------------------------------------------|-------------------------|
| FeSe <sub>2</sub> -C composite nanofibers                       | 0.005-3.0         | 1000                                  | 1123                                               | 71                               | 927 (200)                                                           | <b><i>This work</i></b> |
| Reduced graphene oxide wrapped FeS nanocomposite                | 0.005-3.0         | 100                                   | 1357                                               | 82                               | 978 (40)                                                            | S11                     |
| FeS <sub>2</sub> nanowire                                       | 1.1-2.4           | 89                                    | 668                                                | 61                               | 350 (50)                                                            | S12                     |
| TiO <sub>2</sub> modified FeS nanostructure                     | 0.01-3.0          | 200                                   | 920                                                | 76                               | 635 (100)                                                           | S13                     |
| FeS <sub>2</sub> microspheres wrapped by reduced graphene oxide | 0.01-3.0          | 890                                   | 763                                                | 68                               | 970 (300)                                                           | S14                     |
| FeS <sub>2</sub> /C composite                                   | 1.2-2.6           | 44.5                                  | 784                                                | 79                               | 495 (50)                                                            | S15                     |
| FeSe <sub>2</sub> nanoflowers                                   | 1.1-2.6           | 40                                    | 389                                                | -                                | 242 (25)                                                            | S16                     |
| Layer structured $\alpha$ -FeSe                                 | 1.2-2.5           | 40                                    | 390                                                | 90                               | 340 (40)                                                            | S17                     |

## References

- S1. B. Wang, J. S. Chen, H. B. Wu, Z. Wang, X. W. Lou, *J. Am. Chem. Soc.*, 2011, **133**, 17146-17148.
- S2. J. Zhu, Z. Yin, D. Yang, T. Sun, H. Yu, H. E. Hoster, H. H. Hng, H. Zhang, Q. Yan, *Energy Environ. Sci.*, 2013, **6**, 987-993.
- S3. L. Zhang, H. B. Wu, S. Madhavi, H. H. Hng, X. W. Lou, *J. Am. Chem. Soc.*, 2012, **134**, 17388-17391.
- S4. M. Sasidharan, N. Gunawardhana, M. Yoshio, K. Nakashima, *Ionics*, 2013, **19**, 25-31.

- S5. L. Liu, X. Yang, C. Lv, A. Zhu, X., Zhu, S. Guo, C. Chen, D. Yang, *ACS Appl. Mater. Interfaces*, 2016, **8**, 7047-7053.
- S6. K. S. Lee, S. Park, W. Lee, Y. S. Yoon, *ACS Appl. Mater. Interfaces*, 2016, **8**, 2027-2034.
- S7. Z. Padashbarmchi, A. H. Hamidian, H. Zhang, L. Zhou, N. Khorasani, M. Kazemzad, C. Yu, *RSC Adv.*, 2015, **5**, 10304-10309.
- S8. Y. Chen, J. Wang, J. Jiang, M. A. Zhou, J. Zhu, S. Han, *RSC Adv.*, 2015, **5**, 21740-21744.
- S9. J. Liu, X. Xu, R. Hu, L. Yang, M. Zhu, *Adv. Energy Mater.*, 2016, **6**, 1600256.
- S10. Z. Du, S. Zhang, J. Zhao, X. Wu, R. Lin, *J. Nanosci. Nanotechnol.*, 2013, **13**, 3602-3605.
- S11. L. Fei, Q. Lin, B. Yuan, G. Chen, P. Xie, Y. Li, Y. Xu, S. Deng, S. Smirnov, H. Luo, *ACS Appl. Mater. Interfaces*, 2013, **5**, 5330-5335.
- S12. L. Li, M. Cabán-Acevedo, S. N. Girard, S. Jin, *Nanoscale*, 2014, **6**, 2112-2118.
- S13. X. Wang, Q. Xiang, B. Liu, L. Wang, T. Luo, D. Chen, G. Shen, *Sci. Rep.*, 2013, **3**, 2007-2014.
- S14. H. Xue, Y. W. Denis, J. Qing, X. Yang, J. Xu, Z. Li, M. Sun, W. Kang, Y. Tang, C. S. Lee, *J. Mater. Chem. A*, 2015, **3**, 7945-7949.
- S15. D. Zhang, Y. J. Mai, J. Y. Xiang, X. H. Xia, Y. Q. Qiao, J. P. Tu, *J. Power Sources*, 2012, **217**, 229-235.
- S16. L. Q. Mai, Y. Gao, J. G. Guan, B. Hu, L. Xu, W. Jin, *Int. J. Electrochem. Sci.*, 2009, **4**, 755-761.
- S17. D. Wei, J. Liang, Y. Zhu, L. Hu, K. Zhang, J. Zhang, Z. Yuan, Y. Qian, Y. *Electrochem. Commun.*, 2014, **38**, 124-127.
